# Supplementary material
Source: PubMed Central journal article supplement (PMC6048443)
Supplement: NIHMS956247-supplement-1.pdf [file NIHMS956247-supplement-1.pdf]

**Supplemental Table 1: Antibody list.**

| <b>Antibody</b>                             | <b>Format</b>              | <b>Clone</b> | <b>Company</b> |
|---------------------------------------------|----------------------------|--------------|----------------|
| CD3 $\zeta$                                 | FITC                       | 6B10.2       | Biolegend      |
| CD49b                                       | FITC                       | DX5          | Biolegend      |
| CD3 $\zeta$                                 | PE                         | 6B10.2       | Biolegend      |
| IFN $\gamma$                                | PE                         | 4S.B3        | Biolegend      |
| IFN $\gamma$                                | PE                         | XMG1.2       | Biolegend      |
| TCR V $\alpha$ 24-J $\alpha$ 18 (iNKT cell) | PE                         | 6B11         | Biolegend      |
| CD4                                         | PerCP                      | GK1.5        | Biolegend      |
| CD45RA                                      | Pe-Cy7                     | HI100        | Biolegend      |
| TNF                                         | Pe-Cy7                     | MAb11        | Biolegend      |
| CD8                                         | APC                        | HIT8a        | Biolegend      |
| TNF                                         | APC                        | MP6-XT22     | Biolegend      |
| CD107a                                      | APC                        | H4A3         | Biolegend      |
| CD107a                                      | APC                        | 1D4B         | Biolegend      |
| CD16                                        | APC                        | 93           | Biolegend      |
| CD16                                        | Alexa Fluor 700            | 3G8          | Biolegend      |
| CD3 $\epsilon$                              | APC-Cy7                    | HIT3a        | Biolegend      |
| CD56                                        | Pacific Blue               | NCAM         | Biolegend      |
| NKp30                                       | PE                         | P30-15       | Biolegend      |
| NKp46                                       | APC                        | 29A1.4       | Biolegend      |
| NKp46                                       | APC                        | 9E2          | Biolegend      |
| APC Rat IgG2a, $\kappa$ Isotype Ctrl        | APC                        | RTK2758      | Biolegend      |
| Mouse IgG1, $\kappa$ Isotype Ctrl           | FITC, PE, APC or unlabeled | MOPC-21      | Biolegend      |
| Goat anti-mouse crosslinker                 |                            |              | EMD Millipore  |

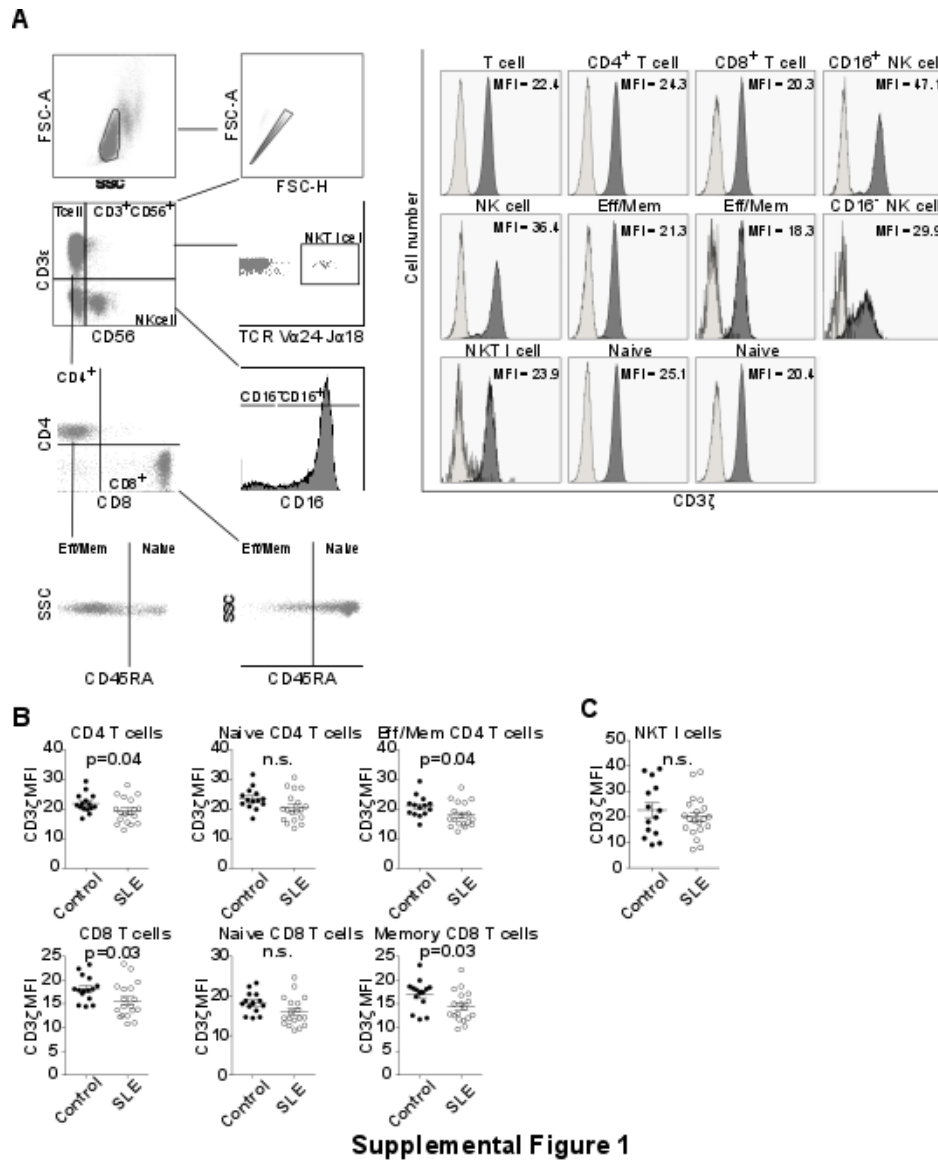

**Supplemental Figure 1: Gating strategy and CD3ζ levels in T cell subsets.**

(A, left) Representative dot plots and histograms showing the gating strategy for the different cell population including isotype control for anti-CD3ζ in lighter grey. (A, right) Representative histogram showing MFI in the different cells previously gated. (B) Scatter diagrams showing individual MFI values from different T cell subsets from control and SLE patients. (C) Scatter diagram showing individual MFI values from different NKT type I cell from control and SLE patients.

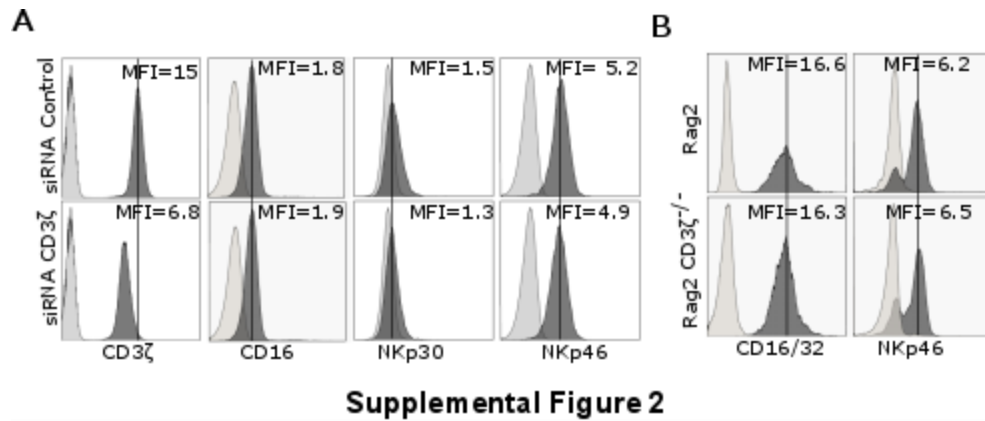

**Supplemental Figure 2: CD16, NKp30 and NKp46 levels are not affected by CD3ζ levels.**

(A) Representative histograms showing expression levels of CD3ζ, CD16, NKp30 and NKp46 (dark grey) from NKL cells electroporated with CD3ζ siRNA or control siRNA including isotype control (light grey). (B) Representative histograms showing CD16/32 and NKp46 levels (dark grey) in NK cells from *Rag2* knockout or *Rag2* knockout CD3ζ<sup>-/-</sup> including isotype controls (light grey).

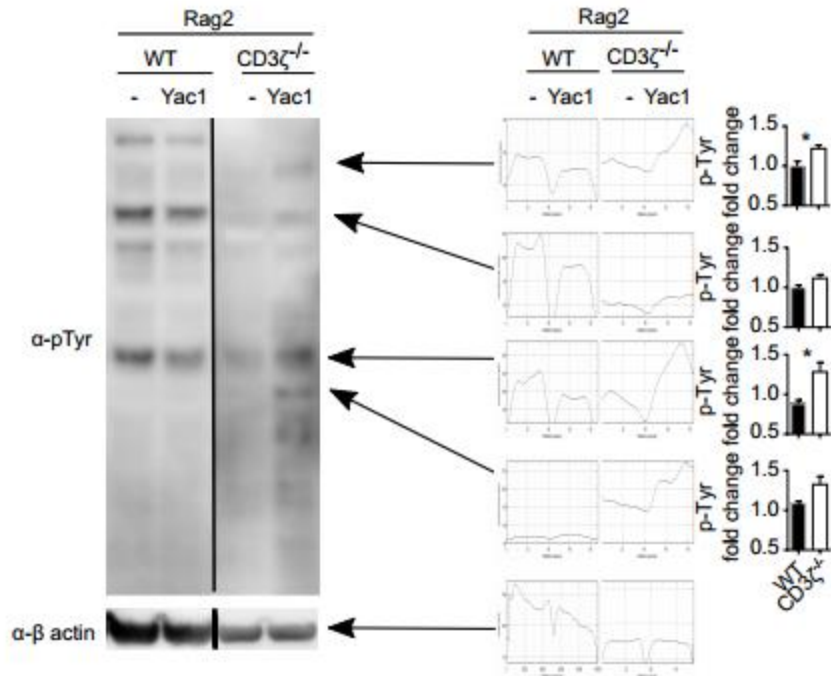

**Supplemental Figure 3**

**Supplemental Figure 3: Deletion of CD3 $\zeta$  alters natural cytotoxicity in murine NK cells.**

Interleukin-2 activated Natural Killer cells from Rag2 or Rag2 CD3 $\zeta$ <sup>-/-</sup> mice were activated with Yac-1 cells for one minute. A representative Western blot (out of 3) is shown for phosphotyrosine and  $\beta$ -actin, and band density profile is shown on the center. Data were normalized (fold change over the unstimulated condition) and cumulative data for each quantified band are shown on the left. T-test was used to evaluate differences. \*p < 0.05
